# Supplementary material
Source: publisher figshare collection journal article supplement (https://gsapubs.figshare.com/ndownloader/files/23315447)
Supplement: Supplementary file 1 [file 23315447]

## Sheet: Table DR1
	TABLE DR1. SUMMARIZED APATITE (U-Th)/He DATA
	Name	Mass (ug)	Ft*	U (ppm)	Th (ppm)	147Sm (ppm)	Th/U	He (nmol/g)	Mean age (Ma)	St. Dev.† (Ma)
	S-62	5.035	0.73	62.735	6.705	77.01	0.079325	0.739	2.7875	0.617488
	S-193	3.8325	0.71	6.2225	2.6875	80.965	0.4978	0.075	2.725	0.512803
	S-WSD	1.3475	0.5775	30.52	70.02	89.775	2.5972	0.2775	1.675	0.575818
	S-448	7.74	0.766667	7.09	2.55	55.7133	0.479533	0.137	4.11333	0.673375
	S-585	8.07667	0.775067	24.7229	3.68977	51.7112	0.136209	0.447807	4.01155	0.480934
	S-795	4.4275	0.7225	7.82	2.795	72.475	0.3972	0.12975	3.585	0.728583
	S-971	4.87	0.745	10.16	1.325	66.7425	0.14015	0.1505	3.4675	0.418121
	S-1154	2.84	0.673333	6.68	0.886667	22.9933	0.1635	0.0786667	2.46333	1.11339
	S-1278	7.67333	0.773333	3.18	0.37	12.8567	0.143067	0.0373333	2.53333	0.438216
	S-SMG	2.272	0.646	37.74	86.76	131.636	2.35722	0.7896	3.722	0.483911
	Note: See Appendix A for explanation of analytical procedures and errors.
	*Ft = alpha ejection correction (Farley et al., 1996).
	†St. Dev. = Standard deviation of the aliquots ages.

## Sheet: Table DR2
	TABLE DR2. SUMMARIZED ZIRCON (U-Th)/He DATA
	Name	Mass (ug)	Ft*	U (ppm)	Th (ppm)	147Sm (ppm)	Th/U	He (nmol/g)	Mean age (Ma)	St. Dev.† (Ma)
	zS-62	8.38727	0.787509	285.125	50.08	-1.47252	0.176838	5.72114	4.51525	0.489114
	zS-193	8.67842	0.785805	366.563	56.2632	1.16755	0.158225	9.87076	6.25381	0.713125
	zS-WSD	6.31035	0.768085	60.0225	42.6203	1.11287	0.684299	2.03334	7.15823	2.45804
	zS-448	15.8931	0.829736	574.445	43.9224	2.97013	0.0779846	16.9825	6.44776	0.219356
	zS-585	20.6007	0.841784	608.761	44.2641	1.00218	0.0732696	16.6977	6.03462	1.01359
	zS-795	5.37987	0.762095	232.2	39.9467	0.804037	0.156393	5.68417	5.61579	0.411614
	zS-971	4.30017	0.746599	870.633	68.0331	-1.14568	0.0782884	21.6443	5.87205	1.22895
	zS-1154	3.72378	0.742602	484.927	56.1754	2.06777	0.117595	10.4989	5.28771	0.370462
	zS-1278	4.38586	0.748833	256.263	45.431	0.86951	0.176867	5.88355	5.41649	0.413499
	zs-SMG	7.93391	0.780974	132.713	135.384	2.87047	0.998241	4.60144	6.70589	1.88273
	Note: See Appendix A for explanation of analytical procedures and errors.
	*Ft = alpha ejection correction (Farley et al., 1996).
	†St. Dev. = Standard deviation of the aliquots ages.

## Sheet: Table DR3
TABLE DR3. APATITE (U-Th)/He DATA
Name	L (µm)	W (µm)	Mass (ug)	Ft	U (ppm)	Th (ppm)	147Sm (ppm)	[U]e	Th/U	He (nmol/g)	Corrected Age (Ma)	error (Ma)	Mean age (Ma)	St.Dev (Ma)
S-62	191.202	106.607	5.035	0.73	62.735	6.705	77.01	64.665	0.079325	0.739	-	0.17	2.7875	0.617488
S-62-1	174.13	95.03	3.17	0.71	74.99	3.66	56.4	76.12	0.0489	0.569	1.94	0.12
S-62-2	160.04	74.24	1.78	0.65	30.72	2.43	79.27	31.68	0.0792	0.321	2.86	0.17
S-62-3	254.37	144.31	10.67	0.81	17.03	0.54	23.83	17.27	0.0317	0.221	2.93	0.18
S-62-4	176.27	112.85	4.52	0.75	128.2	20.19	148.54	133.59	0.1575	1.845	3.42	0.21
S-193	194.993	97.915	3.8325	0.71	6.2225	2.6875	80.965	7.25	0.4978	0.075	-	0.165	2.725	0.512803
S-193-1	316.15	99.33	6.28	0.74	9.36	3.67	68.43	10.55	0.3925	0.093	2.16	0.13
S-193-2	164.74	105.77	3.71	0.72	3.15	2.76	165.58	4.62	0.8755	0.066	3.32	0.2
S-193-3	163.25	99.87	3.28	0.71	7.41	2.19	48.77	8.16	0.2951	0.079	2.47	0.15
S-193-4	135.83	86.69	2.06	0.67	4.97	2.13	41.08	5.67	0.4281	0.062	2.95	0.18
S-WSD	154.45	64.9375	1.3475	0.5775	30.52	70.02	89.775	47.0875	2.5972	0.2775	-	0.0975	1.675	0.575818
S-WSD-1	169.15	69.88	1.66	0.61	44.67	96.13	117.92	67.39	2.1518	0.542	2.41	0.14
S-WSD-2	196.65	68.52	1.86	0.61	23.92	41.05	80.14	33.77	1.7164	0.159	1.41	0.08
S-WSD-3	129.07	60.78	0.96	0.54	13.94	62.58	48.47	28.59	4.4896	0.092	1.07	0.06
S-WSD-4	122.93	60.57	0.91	0.55	39.55	80.32	112.57	58.6	2.031	0.317	1.81	0.11
S-448	275.82	117.477	7.74	0.766667	7.09	2.55	55.7133	7.96	0.479533	0.137	-	0.243333	4.11333	0.673375
S-448-1	222.18	141.64	8.97	0.79	7.79	1.84	54.72	8.49	0.236	0.84	22.65	1.36
S-448-2	293.47	113.62	7.63	0.76	5.1	4.62	18.49	6.26	0.9044	0.126	4.87	0.29
S-448-3	294.51	127.04	9.57	0.78	3.11	1.24	11.79	3.46	0.397	0.053	3.58	0.21
S-448-4	239.48	111.77	6.02	0.76	13.06	1.79	136.86	14.16	0.1372	0.232	3.89	0.23
S-585	248.767	124.597	8.07667	0.775067	24.7229	3.68977	51.7112	25.829	0.136209	0.447807	-	0.239159	4.01155	0.480934
S-585-1	260.71	126.6	8.41	0.78	0.7	0.15	1.12	0.74	0.2154	0.012	3.83	0.23
S585-2	296.05	141.05	11.86	0.8052	15.2887	1.7693	50.1936	15.947	0.115726	0.253421	3.62464	0.217478
S-585-3	237.05	121.86	7.09	0.77	21	2.23	53.2	21.78	0.1063	0.354	3.86	0.23
S-585-4	213.2	110.88	5.28	0.75	37.88	7.07	51.74	39.76	0.1866	0.736	4.55	0.27
Continued
Name	L (µm)	W (µm)	Mass (ug)	Ft*	U (ppm)	Th (ppm)	147Sm (ppm)	[U]e	Th/U	He (nmol/g)	Corrected Age (Ma)	error (Ma)	Mean age (Ma)	St. Dev.† (Ma)
S-795	213.715	100.245	4.4275	0.7225	7.82	2.795	72.475	8.83	0.3972	0.12975	-	0.215	3.585	0.728583
S-795-1	256.41	110.02	6.25	0.75	5.09	2.01	43.28	5.77	0.3953	0.088	3.65	0.22
S-795-2	245.44	101.81	5.12	0.73	6.64	3.26	30.94	7.55	0.4917	0.133	4.39	0.26
S-795-3	185.83	88.92	2.96	0.7	15.7	4.25	199.16	17.68	0.2707	0.254	3.68	0.22
S-795-4	167.18	100.23	3.38	0.71	3.85	1.66	16.52	4.32	0.4311	0.044	2.62	0.16
S-971	206.283	107.607	4.87	0.745	10.16	1.325	66.7425	10.795	0.14015	0.1505	-	0.225	3.4675	0.418121
S-971-1	162.86	94.85	2.95	0.68	0.06	0.35	0	0.14	5.6933	0.001	2.58	0.15
S-971-2	175.58	101	3.61	0.73	10.64	1.17	167.54	11.74	0.1099	0.157	3.28	0.2
S-971-3	218.28	119.27	6.25	0.77	11.32	1.33	36.15	11.81	0.1177	0.157	3.19	0.19
S-971-4	252.96	106.27	5.75	0.75	7.51	1.89	36.02	8.12	0.2514	0.136	4.09	0.25
S-971-5	178.31	103.89	3.87	0.73	11.17	0.91	27.26	11.51	0.0816	0.152	3.31	0.26
S-1154	174.5	85.3633	2.84	0.673333	6.68	0.886667	22.9933	7	0.1635	0.0786667	-	0.146667	2.46333	1.11339
S-1154-1	201.37	79.65	2.57	0.67	4.48	1.11	14.63	4.81	0.2473	0.037	2.07	0.12
S-1154-2	166.4	100.44	3.38	0.7	0.11	0.15	0	0.14	1.3483	0.002	3.12	0.19
S-1154-3	95.53	72.39	1.01	0.61	4.16	0.71	37.22	4.51	0.1693	0.024	1.6	0.1
S-1154-4	226.6	104.05	4.94	0.74	11.4	0.84	17.13	11.68	0.0739	0.175	3.72	0.22
S-1278	244.317	125.287	7.67333	0.773333	3.18	0.37	12.8567	3.33	0.143067	0.0373333	-	0.15	2.53333	0.438216
S-1278-1	227.57	110.02	5.55	0.75	1.48	0.31	5.08	1.58	0.2064	0.018	2.74	0.16
S-1278-2	196.34	143	8.08	0.79	2.04	0.28	17.46	2.19	0.1365	0.019	2.03	0.12
S-1278-3	193.38	97.87	3.73	0.72	79.5	8.3	70.7	81.77	0.1044	1.227	3.84	0.23
S-1278-4	309.04	122.84	9.39	0.78	6.02	0.52	16.03	6.22	0.0863	0.075	2.83	0.17
S-SMG	177.796	79.392	2.272	0.646	37.74	86.76	131.636	58.388	2.35722	0.7896	-	0.24	3.722	0.483911
S-SMG-1	172.44	71.68	1.78	0.62	49.8	116.7	121.64	77.31	2.3414	1.125	4.31	0.26
S-SMG-2	152.97	77.11	1.83	0.63	22.7	69.2	87.4	39.06	3.0528	0.403	2.99	0.18
S-SMG-3	197.19	85.23	2.88	0.67	45.6	104.8	163.85	70.56	2.2988	1.016	3.92	0.24
S-SMG-4	198.21	77.52	2.4	0.65	27.7	59.6	125.63	42.08	2.1472	0.539	3.61	0.22
S-SMG-5	168.17	85.42	2.47	0.66	42.9	83.5	159.66	62.93	1.9459	0.865	3.78	0.3
Note: Italicized rows indicate aliquot was excluded from age calculation.
*Ft = alpha ejection correction (Farley et al., 1996).
†St. Dev. = Standard deviation of the aliquots ages.

## Sheet: Table DR4
TABLE DR4. ZIRCON (U-Th)/He DATA
Name	L (µm)	W (µm)	Mass (ug)	Ft	U (ppm)	Th (ppm)	147Sm (ppm)	[U]e	Th/U	He (nmol/g)	Corrected Age (Ma)	error (Ma)	Mean age (Ma)	St.Dev (Ma)
zS-62	182.54	95.0333	8.38727	0.787509	285.125	50.08	-1.47252	296.615	0.176838	5.72114	-	0.36122	4.51525	0.489114
zS-62-1	168.57	85.1	5.67665	0.772576	306.633	75.303	-8.52097	323.925	0.24558	6.56515	4.86306	0.389045
zS-62-2	173.23	75	4.53105	0.753684	359.405	44.3553	2.8092	369.552	0.123413	7.0957	4.7267	0.378136
zS-62-3	205.82	125	14.9541	0.836267	189.336	30.5817	1.2942	196.369	0.161521	3.50257	3.95598	0.316478
zS-193	222.112	89.17	8.67842	0.785805	366.563	56.2632	1.16755	379.521	0.158225	9.87076	-	0.500305	6.25381	0.713125
zS-193-1	215.73	68	4.63854	0.742237	447.576	61.9678	2.08676	461.851	0.138452	10.3019	5.57412	0.44593
zS-193-2	238.18	118	15.4213	0.83434	344.252	50.0997	1.25546	355.792	0.145532	9.64889	6.0282	0.482256
zS-193-3	200.59	88.4	7.28898	0.787374	406.852	57.3279	1.32797	420.056	0.140906	10.9803	6.15736	0.492589
zS-193-4	233.95	82.28	7.36486	0.779271	267.572	55.6572	0	280.384	0.208009	8.55194	7.25554	0.580443
zS-WSD	148.665	92.3775	6.31035	0.768085	60.0225	42.6203	1.11287	69.8329	0.684299	2.03334	-	0.572658	7.15823	2.45804
zS-WSD-1	130.33	79.2	3.80144	0.742676	56.9351	36.2103	2.54579	65.258	0.635992	1.18231	4.51194	0.360955
zS-WSD-2	135.58	114	8.19329	0.802553	40.8516	19.3033	0	45.2952	0.472522	1.82492	9.2892	0.743136
zS-WSD-3	194.45	106	10.1595	0.805911	67.6792	64.0388	1.90568	82.4305	0.946212	2.02252	5.62016	0.449613
zS-WSD-4	134.3	70.31	3.08719	0.721201	74.6242	50.9289	0	86.348	0.682471	3.10361	9.2116	0.736928
zS-448	252.152	113.725	15.8931	0.829736	574.445	43.9224	2.97013	584.571	0.0779846	16.9825	-	0.515821	6.44776	0.219356
zS-448-1	260.36	107	13.861	0.825131	772.373	62.3909	4.19189	786.756	0.0807783	22.7105	6.49072	0.519257
zS-448-2	217.33	114	13.1336	0.828219	668.946	43.7915	0.737004	679.03	0.0654634	19.58	6.4604	0.516832
zS-448-3	227.95	95.9	9.74832	0.805299	321.694	28.8398	2.97937	328.348	0.0896495	8.77166	6.15463	0.49237
zS-448-4	302.97	138	26.8294	0.860295	534.766	40.6676	3.97225	544.148	0.0760474	16.8679	6.68529	0.534823
zS-585	318.132	117.705	20.6007	0.841784	608.761	44.2641	1.00218	618.953	0.0732696	16.6977	-	0.482769	6.03462	1.01359
zS-585-1	323.32	113	19.1974	0.837523	581.597	62.2915	1.51291	595.945	0.107104	15.496	5.75957	0.460765
zS-585-2	316.52	114.82	19.4039	0.839839	534.165	31.4611	0.997778	541.412	0.0588978	17.6172	7.18926	0.575141
zS-585-3	306.75	137	26.7719	0.859919	598.588	40.589	0.361555	607.933	0.0678079	18.0222	6.39681	0.511745
zS-585-4	325.94	106	17.0295	0.829854	720.696	42.7146	1.13647	730.524	0.0592685	15.6555	4.79282	0.383426
Continued
Name	L (µm)	W (µm)	Mass (ug)	Ft	U (ppm)	Th (ppm)	147Sm (ppm)	[U]e	Th/U	He (nmol/g)	Corrected Age (Ma)	error (Ma)	Mean age (Ma)	St. Dev.† (Ma)
zS-795	176.063	79.7	5.37987	0.762095	232.2	39.9467	0.804037	241.389	0.156393	5.68417	-	0.449263	5.61579	0.411614
zS-795-1	164.69	72.5	4.02528	0.744671	132.212	19.8507	0	136.782	0.150143	3.04883	5.55158	0.444126
zS-795-2	169.16	72.9	4.18028	0.745836	406.515	81.1298	2.31552	425.202	0.199574	10.3585	6.05574	0.484459
zS-795-3	194.34	93.7	7.93404	0.795779	157.873	18.8597	0.09659	162.184	0.119461	3.64517	5.24006	0.419205
zS-971	175.25	72.374	4.30017	0.746599	870.633	68.0331	-1.14568	886.288	0.0782884	21.6443	-	0.469764	5.87205	1.22895
zS-971-1	197.05	79.7	5.82031	0.770977	688.82	39.1003	-8.31065	697.779	0.0567642	14.5468	5.01874	0.401499
zS-971-2	155.25	68.77	3.41415	0.733285	1063.12	94.297	0	1084.83	0.0886983	33.6531	7.84851	0.627881
zS-971-3	193.77	64.5	3.74851	0.728578	1149.29	117.206	2.58223	1176.28	0.101981	27.8305	6.02475	0.48198
zS-971-4	171.49	67.9	3.67647	0.734357	535.198	59.5407	0	548.904	0.11125	10.2124	4.70049	0.376039
zS-971-5	158.69	81	4.84142	0.765798	916.736	30.0217	0	923.647	0.0327485	21.9789	5.76776	0.461421
zS-1154	142.55	74.7	3.72378	0.742602	484.927	56.1754	2.06777	497.849	0.117595	10.4989	-	0.423017	5.28771	0.370462
zS-1154-1	109.97	75.2	2.89176	0.732498	473.886	35.6696	3.34664	482.08	0.0752705	9.50071	4.99299	0.399439
zS-1154-2	148.26	70.1	3.38776	0.734393	553.157	62.419	2.85666	567.512	0.112841	11.6064	5.16656	0.413325
zS-1154-3	169.42	78.8	4.89182	0.760916	427.739	70.4376	0	443.954	0.164674	10.3896	5.70358	0.456286
zS-1278	157.342	76.2	4.38586	0.748833	256.263	45.431	0.86951	266.716	0.176867	5.88355	-	0.43332	5.41649	0.413499
zS-1278-1	162.97	86.3	5.64394	0.774669	138.314	24.0049	0	143.84	0.173554	2.90047	4.82721	0.386177
zS-1278-2	133.7	66.9	2.78251	0.718491	250.652	46.2032	3.47804	261.27	0.184332	5.85731	5.78602	0.462882
zS-1278-3	152.19	68.5	3.32063	0.729539	352.843	63.37	0	367.43	0.179598	8.06084	5.57633	0.446106
zS-1278-4	180.51	83.1	5.79637	0.772632	283.242	48.146	0	294.325	0.169982	6.71558	5.47642	0.438114
zs-SMG	198.292	91.898	7.93391	0.780974	132.713	135.384	2.87047	163.893	0.998241	4.60144	-	0.536471	6.70589	1.88273
zS-SMG-1	216.83	98.3	9.7427	0.799768	146.715	114.519	2.98109	173.092	0.780555	5.00892	6.68462	0.53477
zS-SMG-2	142.34	83.9	4.65912	0.755575	108.143	92.9346	2.07754	129.547	0.85937	2.81356	5.30884	0.424707
zS-SMG-3	198.36	108	10.7586	0.807772	198.801	256.616	5.40068	257.901	1.29081	7.53989	6.67024	0.533619
zS-SMG-4	206.11	95.5	8.74095	0.792568	121.535	112.729	2.21495	147.497	0.927538	3.21003	5.06981	0.405585
zS-SMG-5	227.82	73.79	5.76819	0.749185	88.3734	100.121	1.67808	111.43	1.13293	4.43478	9.79594	0.783675
Note: Italicized rows indicate aliquot was excluded from age calculation.
*Ft = alpha ejection correction (Farley et al., 1996).
†St. Dev. = Standard deviation of the aliquots ages.

## Sheet: Table DR5
TABLE S5. U/Pb DATA												Sample	57Fe/	49Ti/	49Ti/	Hf O/	Hf O/	Th/	Th/	U/	Common	Common	Common	Pb corr.	Sample	Age (Ma)	Age (Ma)	Age (Ma)	Age (Ma)	Age (Ma)	Age (Ma)
Sample	206Pb	207Pb/	207Pb*/	207Pb/	207Pb/	206Pb/	206Pb/	Correlation	94Zr2O	94Zr2O	57Fe/	Name	94Zr2O	94Zr2O	94Zr2O	94Zr2O	94Zr2O	94Zr2O	94Zr2O	94Zr2O	206Pb/	207Pb/	208Pb/		Name	206Pb/	206Pb/	207Pb/	207Pb/	207Pb/	207Pb/
Name	(Counts)	206Pb	206Pb	235U	235U	238U	238U	of Concordia	(Counts)		94Zr2O		Error		Error		Error		Error		204Pb	204Pb	204Pb			238U	238U	235U	235U	206Pb	206Pb
			Error		Error		Error	Ellipses		Error		SMG-1	0.00659	0.0859	0.00129	71.2	0.589	0.734	0.00727	1.09	18.86	15.62	38.34	(204Pb)			Error		Error		Error
SMG-1	91.78	0.0768	0.0516	0.0101	0.00735	0.000953	7.86e-05	0.713	2470	-1	0.189	SMG-2	0.318	0.117	0.00152	71.4	0.564	0.714	0.00679	1.01	18.86	15.62	38.34	(204Pb)	SMG-1	6.14	0.506	10.2	7.39	1116	1340
SMG-2	97.17	0.16	0.0399	0.0253	0.00788	0.00115	0.000115	0.722	2700	-1	14.4	SMG-3	0.00887	0.183	0.0021	64.4	0.514	7.1	0.0725	6.48	18.86	15.62	38.34	(204Pb)	SMG-2	7.375	0.741	25.39	7.8	2460	420
SMG-3	99.56	0.0625	0.0053	0.0109	0.00132	0.00127	8.36e-05	0.734	2660	-1	0.15	SMG-4	0.00842	0.129	0.0311	72.4	0.583	0.935	0.0161	1.54	18.86	15.62	38.34	(204Pb)	SMG-3	8.177	0.538	11.05	1.32	692.6	181
SMG-4	93.28	0.121	0.0388	0.0202	0.00744	0.00121	9.44e-05	0.68	2610	-1	0.267	SMG-5	0.0124	0.128	0.00159	66.7	0.519	0.557	0.00798	0.855	18.86	15.62	38.34	(204Pb)	SMG-4	7.808	0.608	20.33	7.41	1972	571
SMG-5	91.33	0.205	0.0468	0.0426	0.0128	0.00151	0.000169	0.759	2800	-1	0.233	SMG-6	0.00669	0.0599	0.00102	97.9	0.806	0.158	0.00425	0.408	18.86	15.62	38.34	(204Pb)	SMG-5	9.707	1.09	42.35	12.5	2866	371
SMG-6	81.03	0.0722	0.146	0.0123	0.0269	0.00123	0.000237	0.879	2490	-1	0.186	SMG-7	0.00654	0.212	0.00244	58.3	0.486	0.233	0.0063	0.22	18.86	15.62	38.34	(204Pb)	SMG-6	7.95	1.53	12.4	27	992.2	4120
SMG-7	50.78	-0.0125	-0.445	-0.00148	0.052	0.000858	0.00043	0.931	2440	-1	0.158	SMG-8	0.0206	0.487	0.00569	72.3	0.716	1.83	0.0805	1.85	18.86	15.62	38.34	(204Pb)	SMG-7	5.531	2.77	-1.506	52.8	-1	-0.445
SMG-8	100	0.234	0.0417	0.0384	0.00864	0.00119	0.000188	0.618	1730	-1	0.289	SMG-9	0.488	0.155	0.035	69.6	0.575	1.83	0.0213	2.12	18.86	15.62	38.34	(204Pb)	SMG-8	7.663	1.21	38.23	8.45	3079	284
SMG-9	100	0.106	0.013	0.0205	0.00315	0.00141	0.000124	0.602	2480	-1	12.7	SMG-10	0.366	0.258	0.126	82.3	13.6	1.12	0.185	1.58	18.86	15.62	38.34	(204Pb)	SMG-9	9.055	0.796	20.61	3.13	1728	225
SMG-10	97.61	0.112	0.0263	0.0129	0.00335	0.000834	5.67e-05	0.488	2210	-1	0.639	SMG-11	0.00689	0.0637	0.00101	76.6	0.6	1.49	0.0413	1.73	18.86	15.62	38.34	(204Pb)	SMG-10	5.372	0.365	13.01	3.36	1835	425
SMG-11	96.33	0.0986	0.0274	0.0182	0.0056	0.00134	0.00011	0.473	2750	-1	0.254	S-795-1	0.0122	0.0411	0.000759	108	0.831	0.0211	0.00114	7.93	18.86	15.62	38.34	(204Pb)	SMG-11	8.641	0.708	18.34	5.58	1597	519
S-795-1	99.9	0.0507	0.00096	0.0907	0.00511	0.013	0.000669	0.942	2860	-1	0.353	S-795-2	0.00671	0.752	0.123	85.4	0.662	0.519	0.00596	2	18.86	15.62	38.34	(204Pb)	S-795-1	83.15	4.26	88.18	4.75	226.6	43.8
S-795-2	99.96	0.106	0.00107	3.03	0.224	0.207	0.0151	0.991	2810	-1	0.326	S-795-3	0.105	0.299	0.01	106	0.89	0.573	0.0158	4.78	18.86	15.62	38.34	(204Pb)	S-795-2	1213	80.9	1415	56.6	1733	18.5
S-795-3	99.9	0.0943	0.00114	0.735	0.0615	0.0565	0.00452	0.99	2710	-1	0.846	S-795-4	0.00414	0.0288	0.000756	105	0.819	0.183	0.00238	1.54	18.86	15.62	38.34	(204Pb)	S-795-3	354.3	27.6	559.3	36	1514	22.8
S-795-4	99.11	0.0516	0.00437	0.0845	0.00985	0.0119	0.000898	0.689	2790	-1	0.124	S-795-5	0.013	0.248	0.00322	100	0.872	0.827	0.0101	3.99	18.86	15.62	38.34	(204Pb)	S-795-4	76.09	5.72	82.39	9.22	269.1	194
S-795-5	99.69	0.0896	0.00169	0.524	0.0404	0.0424	0.00319	0.97	2760	-1	0.378	S-795-6	0.00775	0.176	0.00923	81.1	0.638	1.71	0.0459	2.89	18.86	15.62	38.34	(204Pb)	S-795-5	267.6	19.7	427.6	26.9	1417	36
S-795-6	99.98	0.107	0.00102	3.56	0.281	0.242	0.0184	0.993	2730	-1	0.35	S-795-7	0.00657	0.132	0.00163	81.6	0.638	0.72	0.00847	2.31	18.86	15.62	38.34	(204Pb)	S-795-6	1395	95.7	1540	62.6	1746	17.5
S-795-7	99.97	0.108	0.000797	3.54	0.269	0.239	0.018	0.995	2760	-1	0.202	S-795-8	0.00519	0.073	0.0011	78.6	0.642	0.494	0.0089	1.3	18.86	15.62	38.34	(204Pb)	S-795-7	1380	93.5	1537	60.2	1760	13.5
S-795-8	99.98	0.108	0.000897	4.68	0.37	0.315	0.0244	0.995	2770	-1	0.142	S-795-9	0.00812	0.0844	0.0012	88.8	0.693	0.573	0.00845	1.57	18.86	15.62	38.34	(204Pb)	S-795-8	1766	119	1764	66.2	1761	15.2
S-795-9	99.97	0.105	0.000802	3.42	0.246	0.237	0.0168	0.994	2770	-1	0.292	S-795-10	0.00924	0.0976	0.00133	82.1	0.647	0.552	0.00729	1.5	18.86	15.62	38.34	(204Pb)	S-795-9	1372	87.3	1509	56.6	1707	14.1
S-795-10	99.93	0.106	0.000974	3.18	0.215	0.217	0.0147	0.991	2720	-1	0.483	S-795-11	0.0081	0.0793	0.00115	103	0.804	0.262	0.00479	2.47	18.86	15.62	38.34	(204Pb)	S-795-10	1268	78.1	1452	52.1	1734	16.8
S-795-11	99.89	0.0915	0.000907	0.583	0.042	0.0462	0.00335	0.991	2780	-1	0.254	WSD-1	0	N.D.*	0	N.D.*	0	N.D.*	0	N.D.*	18.86	15.62	38.34	(204Pb)	S-795-11	291.1	20.6	466.1	27	1457	18.9
WSD-1	40.29	0.329	0.288	-7.35	13.9	-0.162	0.306	0.892	0	-1	N.D.*	WSD-2	0.0315	0.122	0.00231	102	1.71	0.415	0.00786	1.98	18.86	15.62	38.34	(204Pb)	WSD-1	-1141	2350	N.D.*	-2220	3610	1340
WSD-2	63.79	0.113	0.178	0.0162	0.028	0.00105	0.000238	0.68	1680	-1	0.445	WSD-3	0.00546	0.342	0.00339	78.6	0.624	6.58	0.11	4.35	18.86	15.62	38.34	(204Pb)	WSD-2	6.73	1.53	16.32	28	1840	2860
WSD-3	98.22	0.0696	0.0101	0.0144	0.0025	0.0015	0.000116	0.559	2680	-1	0.153	WSD-4	0.00464	0.262	0.0032	74.3	0.672	1.52	0.0149	1.31	18.86	15.62	38.34	(204Pb)	WSD-3	9.676	0.75	14.53	2.5	916.9	298
WSD-4	94.17	0.092	0.0287	0.0205	0.00727	0.00161	0.000133	0.61	2630	-1	0.157														WSD-4	10.4	0.854	20.59	7.24	1468	592
												Continued													Note: Italicized rows indicate aliquot was excluded from age calculation.
Continued																									Boldened indicates which isotopic age was used for mean age calculation.
																									*N.D. = Not determined.

## Sheet: Table DR6
TABLE DR6. SUMMARIZED 40Ar/39Ar DATA
					Preferred Age
Name	Lot #	Irradiation	Mineral	Age	N	%39Ar	MSWD	Age			N	Age
				(Ma)				(Ma)				(Ma)
S-62	65814-01	NM-291D	Biotite	Plateau	3	37.9602	10.82	7.43429	±	0.0621221	13	7.16161	±	0.0138022
S-971	65811-01	NM-291D	Biotite	Plateau	4	57.6577	1.87	8.08985	±	0.0163188	13	7.82411	±	0.0125222
S-1278	65813-01	NM-291D	Biotite	Plateau	7	61.8666	10.16	9.43562	±	0.0428437	13	9.44295	±	0.013404
S-193	65790-01	NM-291C	Feldspar	No Plateau							28	9.58346	±	0.134228
S-448	65786-02	NM-291C	Feldspar	No Plateau							35	8.33599	±	0.0475172
S-971	65788-01	NM-291C	Feldspar	No Plateau							35	8.83874	±	0.0191218
S-1278	65786-01	NM-291C	Feldspar	No Plateau							32	26.6649	±	0.165293
S-193	65805-01	NM-291D	Muscovite	Plateau	23	100	0.74	8.24148	±	0.041659	23	8.07202	±	0.0457493
S-971	65809-01	NM-291D	Muscovite	No Plateau							23	24.4822	±	0.0413939
S-1278	65807-01	NM-291D	Muscovite	No Plateau							23	31.8066	±	0.0331916

## Sheet: Table DR7
	TABLE DR7. BIOTITE Ar/Ar STEP-HEATING DATA
		ID	Power/Temp.	40Ar/39Ar	37Ar/39Ar	36Ar/39Ar	39ArK	K/Ca	40Ar*	39Ar	Age	±1σ	Time	Dur Heating At Req Pwr	Comment	Irrad.	Ar40_Disc	Ar40_DiscEr
			(Watts/°C)			(x 10-3)	(x 10-15 mol)		(%)	(%)	(Ma)	(Ma)	(min)
	S-62, Biotite, 2.9 mg, J=0.0018687±0.02%, IC=1.01579±0.00286, NM-291D, Lab#=65814-01
	X	A	0.5	39.1134	0.0256252	128.695	0.501921	19.9102	2.7555	0.402607	3.6822	0.961414
	X	B	0.8	14.17	0.0580878	41.4547	2.40493	8.78332	13.5319	2.33168	6.54348	0.250564		40	D:12 Biotite, 3.78 mg	NM-291D	1	0
	X	C	1	6.65404	0.0270656	15.8388	3.9008	18.8506	29.6031	5.46064	6.71688	0.121575		40	D:12 Biotite, 3.78 mg	NM-291D	1	0
	X	D	1.5	4.6025	0.0174347	8.4237	7.57415	29.2637	45.846	11.5361	7.18994	0.0636083		40	D:12 Biotite, 3.78 mg	NM-291D	1	0
	X	E	1.9	4.21299	0.0199882	7.0392	8.00591	25.5253	50.5652	17.9579	7.2575	0.0530029		40	D:12 Biotite, 3.78 mg	NM-291D	1	0
	X	F	2	4.56874	0.021549	8.3207	5.73495	23.6765	46.1203	22.5581	7.17983	0.0732802		40	D:12 Biotite, 3.78 mg	NM-291D	1	0
	X	G	2.2	3.76364	0.0205465	5.5212	5.76898	24.8317	56.5969	27.1856	7.25501	0.0559389		40	D:12 Biotite, 3.78 mg	NM-291D	1	0
	X	H	2.5	3.89683	0.0179661	6.0505	6.84901	28.3981	54.0548	32.6794	7.17507	0.0532528		40	D:12 Biotite, 3.78 mg	NM-291D	1	0
	X	I	3	3.52007	0.0223618	4.7892	8.63255	22.8159	59.7502	39.6039	7.16257	0.0423415		40	D:12 Biotite, 3.78 mg	NM-291D	1	0
	X	J	5	3.28424	0.0275318	3.872	27.9703	18.5314	65.1405	62.0398	7.28406	0.022134		40	D:12 Biotite, 3.78 mg	NM-291D	1	0
		K	7	3.68156	0.0520342	5.1628	23.2881	9.80517	58.5799	80.7199	7.34505	0.0271652		40	D:12 Biotite, 3.78 mg	NM-291D	1	0
		L	10	3.71377	0.0233563	5.0747	16.2667	21.8444	59.5796	93.768	7.53535	0.0331256		40	D:12 Biotite, 3.78 mg	NM-291D	1	0
		M	15	3.46909	0.0080975	4.2897	7.76932	63.0076	63.3891	100	7.48771	0.0430348		40	D:12 Biotite, 3.78 mg	NM-291D	1	0
	Integrated age ± 1σ				n=13		124.668	18.0027	K2O=8.84%		7.16161	0.0138022		40	D:12 Biotite, 3.78 mg	NM-291D	1	0
	Plateau ± 1σ			steps K-M	n=3	MSWD=10.82	47.3241	22.7 ±27.9		37.9602	7.43429	0.0621221				NM-291D
	Continued
		ID	Power/Temp.	40Ar/39Ar	37Ar/39Ar	36Ar/39Ar	39ArK	K/Ca	40Ar*	39Ar	Age	±1σ	Time
			(Watts/°C)			(x 10-3)	(x 10-15 mol)		(%)	(%)	(Ma)	(Ma)	(min)			NM-291D
	S-971, Biotite, 3.78 mg, J=0.0018704±0.02%, IC=1.01579±0.00286, NM-291D, Lab#=65811-01
	X	A	0.5	46.0879	0.0289822	150.769	0.77781	17.604	3.31947	0.488854	5.22954	0.893416		40	D:15 Biotite, 2.72 mg	NM-291D	1	0
	X	B	0.8	18.208	0.0201658	55.8265	2.56915	25.3005	9.36353	2.10357	5.82518	0.290073		40	D:15 Biotite, 2.72 mg	NM-291D	1	0
	X	C	1	8.42708	0.0061671	21.5307	3.60214	82.73	24.4294	4.36752	7.02762	0.141778		40	D:15 Biotite, 2.72 mg	NM-291D	1	0
	X	D	1.5	5.22113	0.0039208	9.9605	9.18139	130.128	43.5385	10.138	7.75335	0.0658019		40	D:15 Biotite, 2.72 mg	NM-291D	1	0
	X	E	1.9	4.44614	0.0036455	7.1739	11.7641	139.954	52.2341	17.5318	7.91848	0.046613		40	D:15 Biotite, 2.72 mg	NM-291D	1	0
	X	F	2	4.30199	0.003214	6.6944	8.96897	158.744	53.9299	23.1688	7.90998	0.0510001		40	D:15 Biotite, 2.72 mg	NM-291D	1	0
	X	G	2.2	4.1993	0.0043368	6.3348	8.31101	117.645	55.3392	28.3923	7.92253	0.0527882		40	D:15 Biotite, 2.72 mg	NM-291D	1	0
	X	H	2.5	4.43175	0.0049799	7.1199	9.48733	102.453	52.4425	34.3551	7.92427	0.0507845		40	D:15 Biotite, 2.72 mg	NM-291D	1	0
	X	I	3	3.62749	0.0058539	4.4221	12.7085	87.1563	63.9043	42.3423	7.9004	0.0320565		40	D:15 Biotite, 2.72 mg	NM-291D	1	0
		J	5	3.37335	0.0035195	3.3813	35.0513	144.965	70.3134	64.3721	8.08186	0.0181768		40	D:15 Biotite, 2.72 mg	NM-291D	1	0
		K	7	3.57666	0.0027535	4.069	30.6556	185.293	66.307	83.6391	8.08188	0.0223367		40	D:15 Biotite, 2.72 mg	NM-291D	1	0
		L	10	3.37904	0.0038208	3.3507	20.2932	133.533	70.6325	96.3934	8.13213	0.0245266		40	D:15 Biotite, 2.72 mg	NM-291D	1	0
		M	15	3.47864	0.0049278	3.8064	5.73837	103.536	67.5983	100	8.01306	0.0505207		40	D:15 Biotite, 2.72 mg	NM-291D	1	0
	Integrated age ± 1σ				n=13		159.109	120.166		K2O=8.64%	7.82411	0.0125222				NM-291D
	Plateau ± 1σ			steps J-M	n=4	MSWD=1.87	91.7385	153.3 ±33.8		57.6577	8.08985	0.0163188				NM-291D
	Continued
														40	D:17 Biotite, 2.9 mg	NM-291D	1	0
														40	D:17 Biotite, 2.9 mg	NM-291D	1	0
														40	D:17 Biotite, 2.9 mg	NM-291D	1	0
														40	D:17 Biotite, 2.9 mg	NM-291D	1	0
														40	D:17 Biotite, 2.9 mg	NM-291D	1	0
														40	D:17 Biotite, 2.9 mg	NM-291D	1	0
														40	D:17 Biotite, 2.9 mg	NM-291D	1	0
														40	D:17 Biotite, 2.9 mg	NM-291D	1	0
														40	D:17 Biotite, 2.9 mg	NM-291D	1	0
														40	D:17 Biotite, 2.9 mg	NM-291D	1	0
														40	D:17 Biotite, 2.9 mg	NM-291D	1	0
														40	D:17 Biotite, 2.9 mg	NM-291D	1	0
		ID	Power/Temp.	40Ar/39Ar	37Ar/39Ar	36Ar/39Ar	39ArK	K/Ca	40Ar*	39Ar	Age	±1σ	Time			NM-291D
			(Watts/°C)			(x 10-3)	(x 10-15 mol)		(%)	(%)	(Ma)	(Ma)	(min)			NM-291D
	S-1278, Biotite, 2.72 mg, J=0.0018701±0.02%, I.C.*=1.01579±0.00286, NM-291D, Lab#=65813-01
	X	A	0.5	37.9385	0.0478101	124.203	0.802011	10.6715	3.24698	0.670815	4.21121	0.690309
	X	B	0.8	13.7858	0.0763164	39.7375	3.02005	6.68538	14.8141	3.19684	6.97365	0.219113		720	C:5 Kspar, 12.83 mg	NM-291C	1	0
	X	C	1	6.32075	0.0651045	12.7637	3.58939	7.83669	40.3321	6.19906	8.69434	0.105508		1320	C:5 Kspar, 12.83 mg	NM-291C	1	0
		D	1.5	5.69959	0.046078	10.0076	7.58079	11.0726	48.1017	12.5398	9.34698	0.0653601		720	C:5 Kspar, 12.83 mg	NM-291C	1	0
		E	1.9	4.71325	0.0241635	6.6994	8.87412	21.1147	57.9626	19.9622	9.31093	0.0510197		1320	C:5 Kspar, 12.83 mg	NM-291C	1	0
		F	2	4.56126	0.0127195	6.0682	6.35737	40.112	60.6358	25.2796	9.42528	0.0572381		720	C:5 Kspar, 12.83 mg	NM-291C	1	0
		G	2.2	4.30593	0.0141884	4.908	6.58363	35.9592	66.2772	30.7863	9.7236	0.0520068		1320	C:5 Kspar, 12.83 mg	NM-291C	1	0
		H	2.5	4.177	0.0217321	4.8051	6.85207	23.477	65.9785	36.5175	9.39025	0.047842		720	C:5 Kspar, 12.83 mg	NM-291C	1	0
		I	3	4.06106	0.0269173	4.2061	9.15356	18.9545	69.3832	44.1737	9.59962	0.0396443		1320	C:5 Kspar, 12.83 mg	NM-291C	1	0
		J	5	3.60244	0.0186837	2.8519	28.5647	27.3074	76.5925	68.0657	9.39821	0.017716		720	C:5 Kspar, 12.83 mg	NM-291C	1	0
	X	K	7	3.75988	0.0329467	2.9228	21.5869	15.4857	77.0473	86.1213	9.86704	0.0205711		1320	C:5 Kspar, 12.83 mg	NM-291C	1	0
	X	L	10	4.18141	0.0272387	3.7655	11.4933	18.7308	73.388	95.7345	10.4528	0.0352989		720	C:5 Kspar, 12.83 mg	NM-291C	1	0
	X	M	15	4.52717	0.0671248	3.9124	5.09974	7.60083	74.5345	100	11.4929	0.0582804		1320	C:5 Kspar, 12.83 mg	NM-291C	1	0
	Integrated age ± 1σ				n=13		119.558	17.2501		K2O=9.03%	9.44295	0.013404		720	C:5 Kspar, 12.83 mg	NM-291C	1	0
	Plateau ± 1σ			steps D-J	n=7	MSWD=10.16	73.9663	25.4 ±10.0		61.8666	9.43562	0.0428437		1320	C:5 Kspar, 12.83 mg	NM-291C	1	0
	Note: X preceding sample ID denotes analyses excluded from plateau age calculations.													720	C:5 Kspar, 12.83 mg	NM-291C	1	0
	*I.C. = detector intercalibration = (40Ar/36Ar) measured divided by 295.5													1320	C:5 Kspar, 12.83 mg	NM-291C	1	0
														720	C:5 Kspar, 12.83 mg	NM-291C	1	0
														1320	C:5 Kspar, 12.83 mg	NM-291C	1	0
														720	C:5 Kspar, 12.83 mg	NM-291C	1	0
														1320	C:5 Kspar, 12.83 mg	NM-291C	1	0
														720	C:5 Kspar, 12.83 mg	NM-291C	1	0
														1320	C:5 Kspar, 12.83 mg	NM-291C	1	0
														720	C:5 Kspar, 12.83 mg	NM-291C	1	0
														1320	C:5 Kspar, 12.83 mg	NM-291C	1	0
														720	C:5 Kspar, 12.83 mg	NM-291C	1	0
														720	C:5 Kspar, 12.83 mg	NM-291C	1	0
														720	C:5 Kspar, 12.83 mg	NM-291C	1	0
														1320	C:5 Kspar, 12.83 mg	NM-291C	1	0
														360	C:5 Kspar, 12.83 mg	NM-291C	1	0
														360	C:5 Kspar, 12.83 mg	NM-291C	1	0
														360	C:5 Kspar, 12.83 mg	NM-291C	1	0
														360	C:5 Kspar, 12.83 mg	NM-291C	1	0
																NM-291C
														720	A:5 and A:6 12.83 mg	NM-291C	1	0
														1320	A:5 and A:6 12.83 mg	NM-291C	1	0
														720	A:5 and A:6 12.83 mg	NM-291C	1	0
														1320	A:5 and A:6 12.83 mg	NM-291C	1	0
														720	A:5 and A:6 12.83 mg	NM-291C	1	0
														1320	A:5 and A:6 12.83 mg	NM-291C	1	0
														720	A:5 and A:6 12.83 mg	NM-291C	1	0
														1320	A:5 and A:6 12.83 mg	NM-291C	1	0
														720	A:5 and A:6 12.83 mg	NM-291C	1	0
														1320	A:5 and A:6 12.83 mg	NM-291C	1	0
														720	A:5 and A:6 12.83 mg	NM-291C	1	0
														1320	A:5 and A:6 12.83 mg	NM-291C	1	0
														720	A:5 and A:6 12.83 mg	NM-291C	1	0
														1320	A:5 and A:6 12.83 mg	NM-291C	1	0
														720	A:5 and A:6 12.83 mg	NM-291C	1	0
														1320	A:5 and A:6 12.83 mg	NM-291C	1	0
														720	A:5 and A:6 12.83 mg	NM-291C	1	0
														1320	A:5 and A:6 12.83 mg	NM-291C	1	0
														720	A:5 and A:6 12.83 mg	NM-291C	1	0
														1320	A:5 and A:6 12.83 mg	NM-291C	1	0
														720	A:5 and A:6 12.83 mg	NM-291C	1	0
														1320	A:5 and A:6 12.83 mg	NM-291C	1	0
														720	A:5 and A:6 12.83 mg	NM-291C	1	0
														1320	A:5 and A:6 12.83 mg	NM-291C	1	0
														720	A:5 and A:6 12.83 mg	NM-291C	1	0
														1320	A:5 and A:6 12.83 mg	NM-291C	1	0
														720	A:5 and A:6 12.83 mg	NM-291C	1	0
														1320	A:5 and A:6 12.83 mg	NM-291C	1	0
														720	A:5 and A:6 12.83 mg	NM-291C	1	0
														1320	A:5 and A:6 12.83 mg	NM-291C	1	0
														3720	A:5 and A:6 12.83 mg	NM-291C	1	0
														7320	A:5 and A:6 12.83 mg	NM-291C	1	0
														360	A:5 and A:6 12.83 mg	NM-291C	1	0
														360	A:5 and A:6 12.83 mg	NM-291C	1	0
														360	A:5 and A:6 12.83 mg	NM-291C	1	0
																NM-291C
														720	C:8 & C:9 11.51 mg	NM-291C	1	0
														1320	C:8 & C:9 11.51 mg	NM-291C	1	0
														720	C:8 & C:9 11.51 mg	NM-291C	1	0
														1320	C:8 & C:9 11.51 mg	NM-291C	1	0
														720	C:8 & C:9 11.51 mg	NM-291C	1	0
														1320	C:8 & C:9 11.51 mg	NM-291C	1	0
														720	C:8 & C:9 11.51 mg	NM-291C	1	0
														1320	C:8 & C:9 11.51 mg	NM-291C	1	0
														720	C:8 & C:9 11.51 mg	NM-291C	1	0
														1320	C:8 & C:9 11.51 mg	NM-291C	1	0
														720	C:8 & C:9 11.51 mg	NM-291C	1	0
														1320	C:8 & C:9 11.51 mg	NM-291C	1	0
														720	C:8 & C:9 11.51 mg	NM-291C	1	0
														1320	C:8 & C:9 11.51 mg	NM-291C	1	0
														720	C:8 & C:9 11.51 mg	NM-291C	1	0
														1320	C:8 & C:9 11.51 mg	NM-291C	1	0
														720	C:8 & C:9 11.51 mg	NM-291C	1	0
														1320	C:8 & C:9 11.51 mg	NM-291C	1	0
														720	C:8 & C:9 11.51 mg	NM-291C	1	0
														1320	C:8 & C:9 11.51 mg	NM-291C	1	0
														720	C:8 & C:9 11.51 mg	NM-291C	1	0
														1320	C:8 & C:9 11.51 mg	NM-291C	1	0
														720	C:8 & C:9 11.51 mg	NM-291C	1	0
														1320	C:8 & C:9 11.51 mg	NM-291C	1	0
														720	C:8 & C:9 11.51 mg	NM-291C	1	0
														1320	C:8 & C:9 11.51 mg	NM-291C	1	0
														720	C:8 & C:9 11.51 mg	NM-291C	1	0
														1320	C:8 & C:9 11.51 mg	NM-291C	1	0
														720	C:8 & C:9 11.51 mg	NM-291C	1	0
														1320	C:8 & C:9 11.51 mg	NM-291C	1	0
														3720	C:8 & C:9 11.51 mg	NM-291C	1	0
														360	C:8 & C:9 11.51 mg	NM-291C	1	0
														360	C:8 & C:9 11.51 mg	NM-291C	1	0
														360	C:8 & C:9 11.51 mg	NM-291C	1	0
														360	C:8 & C:9 11.51 mg	NM-291C	1	0
																NM-291C
														1320	C:11 & C12, 12.04 mg	NM-291C	1	0
														720	C:11 & C12, 12.04 mg	NM-291C	1	0
														1320	C:11 & C12, 12.04 mg	NM-291C	1	0
														720	C:11 & C12, 12.04 mg	NM-291C	1	0
														1320	C:11 & C12, 12.04 mg	NM-291C	1	0
														720	C:11 & C12, 12.04 mg	NM-291C	1	0
														1320	C:11 & C12, 12.04 mg	NM-291C	1	0
														720	C:11 & C12, 12.04 mg	NM-291C	1	0
														1320	C:11 & C12, 12.04 mg	NM-291C	1	0
														720	C:11 & C12, 12.04 mg	NM-291C	1	0
														1320	C:11 & C12, 12.04 mg	NM-291C	1	0
														720	C:11 & C12, 12.04 mg	NM-291C	1	0
														1320	C:11 & C12, 12.04 mg	NM-291C	1	0
														720	C:11 & C12, 12.04 mg	NM-291C	1	0
														1320	C:11 & C12, 12.04 mg	NM-291C	1	0
														720	C:11 & C12, 12.04 mg	NM-291C	1	0
														1320	C:11 & C12, 12.04 mg	NM-291C	1	0
														720	C:11 & C12, 12.04 mg	NM-291C	1	0
														1320	C:11 & C12, 12.04 mg	NM-291C	1	0
														720	C:11 & C12, 12.04 mg	NM-291C	1	0
														1320	C:11 & C12, 12.04 mg	NM-291C	1	0
														720	C:11 & C12, 12.04 mg	NM-291C	1	0
														1320	C:11 & C12, 12.04 mg	NM-291C	1	0
														720	C:11 & C12, 12.04 mg	NM-291C	1	0
														1320	C:11 & C12, 12.04 mg	NM-291C	1	0
														720	C:11 & C12, 12.04 mg	NM-291C	1	0
														1320	C:11 & C12, 12.04 mg	NM-291C	1	0
														3720	C:11 & C12, 12.04 mg	NM-291C	1	0
																NM-291C
														1920	D:3 & D5 Muscovite, 4.18 mg	NM-291D	1	0
														1920	D:3 & D5 Muscovite, 4.18 mg	NM-291D	1	0
														1920	D:3 & D5 Muscovite, 4.18 mg	NM-291D	1	0
														1920	D:3 & D5 Muscovite, 4.18 mg	NM-291D	1	0
														1920	D:3 & D5 Muscovite, 4.18 mg	NM-291D	1	0
														1920	D:3 & D5 Muscovite, 4.18 mg	NM-291D	1	0
														1920	D:3 & D5 Muscovite, 4.18 mg	NM-291D	1	0
														1920	D:3 & D5 Muscovite, 4.18 mg	NM-291D	1	0
														1920	D:3 & D5 Muscovite, 4.18 mg	NM-291D	1	0
														1920	D:3 & D5 Muscovite, 4.18 mg	NM-291D	1	0
														1920	D:3 & D5 Muscovite, 4.18 mg	NM-291D	1	0
														1920	D:3 & D5 Muscovite, 4.18 mg	NM-291D	1	0
														1920	D:3 & D5 Muscovite, 4.18 mg	NM-291D	1	0
														1920	D:3 & D5 Muscovite, 4.18 mg	NM-291D	1	0
														1920	D:3 & D5 Muscovite, 4.18 mg	NM-291D	1	0
														1920	D:3 & D5 Muscovite, 4.18 mg	NM-291D	1	0
														1920	D:3 & D5 Muscovite, 4.18 mg	NM-291D	1	0
														1920	D:3 & D5 Muscovite, 4.18 mg	NM-291D	1	0
														1920	D:3 & D5 Muscovite, 4.18 mg	NM-291D	1	0
														1920	D:3 & D5 Muscovite, 4.18 mg	NM-291D	1	0
														1920	D:3 & D5 Muscovite, 4.18 mg	NM-291D	1	0
														1920	D:3 & D5 Muscovite, 4.18 mg	NM-291D	1	0
														1920	D:3 & D5 Muscovite, 4.18 mg	NM-291D	1	0
																NM-291D
																NM-291D
														1920	D:6 & D8 Muscovite, 5.90 mg	NM-291D	1	0
														1920	D:6 & D8 Muscovite, 5.90 mg	NM-291D	1	0
														1920	D:6 & D8 Muscovite, 5.90 mg	NM-291D	1	0
														1920	D:6 & D8 Muscovite, 5.90 mg	NM-291D	1	0
														1920	D:6 & D8 Muscovite, 5.90 mg	NM-291D	1	0
														1920	D:6 & D8 Muscovite, 5.90 mg	NM-291D	1	0
														1920	D:6 & D8 Muscovite, 5.90 mg	NM-291D	1	0
														1920	D:6 & D8 Muscovite, 5.90 mg	NM-291D	1	0
														1920	gas in mass spec for long time	NM-291D	1	0
														1920	D:6 & D8 Muscovite, 5.90 mg	NM-291D	1	0
														1920	D:6 & D8 Muscovite, 5.90 mg	NM-291D	1	0
														1920	D:6 & D8 Muscovite, 5.90 mg	NM-291D	1	0
														1920	D:6 & D8 Muscovite, 5.90 mg	NM-291D	1	0
														1920	D:6 & D8 Muscovite, 5.90 mg	NM-291D	1	0
														1920	D:6 & D8 Muscovite, 5.90 mg	NM-291D	1	0
														1920	D:6 & D8 Muscovite, 5.90 mg	NM-291D	1	0
														1920	D:6 & D8 Muscovite, 5.90 mg	NM-291D	1	0
														1920	gas in mass spec for many hours	NM-291D	1	0
														1920	D:6 & D8 Muscovite, 5.90 mg	NM-291D	1	0
														1920	D:6 & D8 Muscovite, 5.90 mg	NM-291D	1	0
														1920	D:6 & D8 Muscovite, 5.90 mg	NM-291D	1	0
														1920	D:6 & D8 Muscovite, 5.90 mg	NM-291D	1	0
														1920	D:6 & D8 Muscovite, 5.90 mg	NM-291D	1	0
																NM-291D
														1920	D:9&D11 muscovite 4.27 mg	NM-291D	1	0
														1920	D:9&D11 muscovite 4.27 mg	NM-291D	1	0
														1920	D:9&D11 muscovite 4.27 mg	NM-291D	1	0
														1920	D:9&D11 muscovite 4.27 mg	NM-291D	1	0
														1920	D:9&D11 muscovite 4.27 mg	NM-291D	1	0
														1920	D:9&D11 muscovite 4.27 mg	NM-291D	1	0
														1920	D:9&D11 muscovite 4.27 mg	NM-291D	1	0
														1920	D:9&D11 muscovite 4.27 mg	NM-291D	1	0
														1920	D:9&D11 muscovite 4.27 mg	NM-291D	1	0
														1920	D:9&D11 muscovite 4.27 mg	NM-291D	1	0
														1920	D:9&D11 muscovite 4.27 mg	NM-291D	1	0
														1920	D:9&D11 muscovite 4.27 mg	NM-291D	1	0
														1920	D:9&D11 muscovite 4.27 mg	NM-291D	1	0
														1920	D:9&D11 muscovite 4.27 mg	NM-291D	1	0
														1920	D:9&D11 muscovite 4.27 mg	NM-291D	1	0
														1920	D:9&D11 muscovite 4.27 mg	NM-291D	1	0
														1920	D:9&D11 muscovite 4.27 mg	NM-291D	1	0
														1920	D:9&D11 muscovite 4.27 mg	NM-291D	1	0
														1920	D:9&D11 muscovite 4.27 mg	NM-291D	1	0
														1920	D:9&D11 muscovite 4.27 mg	NM-291D	1	0
														1920	D:9&D11 muscovite 4.27 mg	NM-291D	1	0
														1920	D:9&D11 muscovite 4.27 mg	NM-291D	1	0
														1920	D:9&D11 muscovite 4.27 mg	NM-291D	1	0
																NM-291D

## Sheet: Table DR8
	TABLE DR8. FELDSPAR Ar/Ar STEP-HEATING DATA
		ID	Temp.	40Ar/39Ar	37Ar/39Ar	36Ar/39Ar	39ArK	K/Ca	40Ar*	39Ar	Age	±1σ	Time
			(°C)			(x 10-3)	(x 10-15 mol)		(%)	(%)	(Ma)	(Ma)	(min)
	S-1278, Feldspar, 12.83 mg, J=0.0018749±0.03%, I.C.*=1.01842±0.00070, NM-291C, Lab#=65786-01
	X	A	400	1674.31	2.43291	5480.41	0.246406	0.209709	3.28726	0.353471	180.066	15.4281	11
	X	B	400	205.389	2.01703	680.587	0.0985401	0.252949	2.15802	0.494827	15.1699	19.6333	21
	X	C	450	195.214	1.9831	623.066	0.154502	0.257275	5.76372	0.716461	38.2656	12.9463	11
	X	D	450	55.0564	1.71606	178.585	0.247071	0.297311	4.38564	1.07088	8.27687	7.69237	21
	X	E	500	120.113	2.4162	367.372	0.38214	0.211159	9.77755	1.61907	39.9333	5.35053	11
	X	F	500	25.9327	3.36901	82.5437	0.527779	0.15144	6.97111	2.37617	6.20662	3.61121	21
	X	G	550	81.8529	6.62683	240.903	0.65424	0.0769907	13.6808	3.31468	38.2083	3.15089	11
	X	H	550	19.5546	10.5199	62.2702	0.896048	0.048499	10.2395	4.60006	6.90751	2.14131	21
	X	I	600	78.8731	11.3214	227.38	1.26844	0.0450655	15.9711	6.41964	43.068	1.71382	11
	X	J	600	20.3681	12.4426	64.7414	1.46343	0.0410046	11.0091	8.51894	7.74472	1.32593	21
	X	K	650	37.0487	9.43918	114.733	1.75462	0.0540517	10.5426	11.0359	13.443	1.16176	11
	X	L	650	17.9023	4.4189	54.778	2.02028	0.115459	11.5486	13.934	7.10064	0.96959	21
	X	M	700	25.3694	1.73701	77.4352	2.05871	0.293726	10.3311	16.8873	8.981	0.971336	11
	X	N	700	12.564	0.818539	35.5473	2.15998	0.623311	16.8669	19.9858	7.25765	0.89445	21
	X	O	750	18.0983	0.660287	53.7081	1.67324	0.772701	12.5626	22.386	7.78631	1.15942	11
	X	P	750	9.79756	0.551104	25.4211	1.69661	0.925785	23.7198	24.8198	7.95449	1.12232	21
	X	Q	800	18.1602	0.548963	52.6311	1.88505	0.929397	14.5641	27.524	9.0539	1.0383	11
	X	R	800	11.0645	0.421352	28.3483	2.30031	1.21087	24.542	30.8238	9.29121	0.834396	21
	X	S	850	25.0343	0.402019	75.5383	2.84166	1.2691	10.9357	34.9001	9.37107	0.729203	11
	X	T	850	14.1126	0.252876	37.5118	2.80141	2.01761	21.5521	38.9188	10.4044	0.695833	21
	X	U	900	26.2245	0.35692	78.6324	3.38609	1.42946	11.4776	43.7761	10.3002	0.613742	11
	X	V	900	15.3474	0.183685	39.8195	3.05044	2.7776	23.3852	48.152	12.2708	0.647827	21
	X	W	950	29.3252	0.402687	87.0686	4.56793	1.267	12.3496	54.7047	12.387	0.479099	11
	X	X	950	20.055	0.232799	50.9493	3.08512	2.19161	24.9906	59.1303	17.1157	0.648113	21
	X	Y	1000	47.3715	0.408884	145.502	4.45101	1.2478	9.29018	65.5153	15.0434	0.539813	11
	X	Z	1000	26.4746	0.341414	65.7429	2.00829	1.49438	26.7015	68.3962	24.0997	0.993757	11
	X	AA	1050	32.3598	0.403534	82.2751	4.65473	1.26434	24.9505	75.0735	27.5025	0.473321	11
	Continued
		ID	Temp.	40Ar/39Ar	37Ar/39Ar	36Ar/39Ar	39ArK	K/Ca	40Ar*	39Ar	Age	±1σ	Time
			(°C)			(x 10-3)	(x 10-15 mol)		(%)	(%)	(Ma)	(Ma)	(min)
	X	AB	1050	34.1996	0.392787	70.1876	3.31387	1.29893	39.4333	79.8272	45.7094	0.648179	21
	X	AC	1100	46.9549	0.33516	42.8575	0.79057	1.52227	73.082	80.9613	114.143	3.18861	5
	X	AD	1150	28.3208	0.471619	57.675	3.81205	1.08181	39.9396	86.4297	38.4151	0.554555	5
	X	AE	1200	27.8966	0.534936	40.1178	7.36383	0.953766	57.6484	96.9932	54.3809	0.307312	5
	X	AF	1250	58.899	1.44182	56.1056	2.09609	0.35386	72.0476	100	140.253	1.39355	5
	Integrated age ± 1σ				n=32		69.7105	0.333195		K2O=1.11%	26.6649	0.165293
	Note: X preceding sample ID denotes analyses excluded from plateau age calculations.
	*I.C. = detector intercalibration = (40Ar/36Ar) measured divided by 295.5
		ID	Temp.	40Ar/39Ar	37Ar/39Ar	36Ar/39Ar	39ArK	K/Ca	40Ar*	39Ar	Age	±1σ	Time
			(°C)			(x 10-3)	(x 10-15 mol)		(%)	(%)	(Ma)	(Ma)	(min)
	S-448, Feldspar, 12.83 mg, J=0.0018749±0.03%, IC=1.01842±0.00070, NM-291C, Lab#=65786-02
	X	A	400	589.871	0.0549092	1920.81	0.50755	9.29178	3.77578	0.175917	74.8872	5.51283	11
	X	B	400	110.051	0.119135	364.621	0.466409	4.28258	2.09685	0.337574	7.90264	4.29852	21
	X	C	450	163.226	0.056365	521.258	0.747568	9.05179	5.6315	0.596681	31.2779	2.9638	11
	X	D	450	36.175	0.0564035	114.684	0.926899	9.04561	6.3087	0.917944	7.81412	2.11367	21
	X	E	500	100.904	0.0282545	322.9	2.49843	18.0574	5.43344	1.7839	18.7189	1.01248	11
	X	F	500	19.5545	0.0692312	59.8063	2.54372	7.36957	9.61063	2.66555	6.43587	0.779419	21
	X	G	550	56.4148	0.112104	182.069	3.82509	4.55116	4.63466	3.99132	8.95082	0.652028	11
	X	H	550	12.2012	0.184147	35.7382	4.51251	2.77063	13.5064	5.55536	5.64372	0.446801	21
	X	I	600	46.3527	0.184923	148.798	5.34695	2.759	5.15544	7.40861	8.18261	0.466017	11
	X	J	600	9.85526	0.182178	27.6245	5.70758	2.80058	17.2476	9.38686	5.81998	0.346914	21
	X	K	650	33.0632	0.159627	104.88	5.67791	3.19623	6.27862	11.3548	7.1096	0.432078	11
	X	L	650	9.37559	0.133577	26.1321	6.22227	3.81956	17.6758	13.5115	5.67394	0.322869	21
	X	M	700	32.002	0.0719769	101.422	5.56494	7.08844	6.3415	15.4403	6.95015	0.418381	11
	X	N	700	6.99721	0.0468319	17.9325	5.33053	10.8944	24.2282	17.2878	5.80192	0.366067	21
	X	O	750	36.5815	0.0653845	117.992	4.38618	7.80313	4.6796	18.8081	5.86458	0.520571	11
	X	P	750	7.67183	0.0542101	19.9657	4.4316	9.4116	23.0666	20.3441	6.05661	0.439459	21
	X	Q	800	47.7338	0.0719148	154.729	3.5945	7.09456	4.20861	21.5899	6.88077	0.637451	11
	X	R	800	5.49356	0.0492007	12.8921	3.74004	10.3699	30.6153	22.8862	5.75407	0.510428	21
	X	S	850	38.5378	0.0693279	124.283	3.33451	7.35929	4.69536	24.042	6.19855	0.659443	11
	X	T	850	7.07575	0.0528086	18.042	4.93007	9.66138	24.6197	25.7507	5.9617	0.394185	21
	X	U	900	26.5147	0.0531699	83.0854	5.23635	9.59573	7.38896	27.5656	6.70953	0.42643	11
	X	V	900	7.69682	0.0372074	19.8585	6.34362	13.7124	23.7108	29.7643	6.24566	0.311303	21
	X	W	950	22.0457	0.0337079	68.1589	6.25646	15.136	8.61645	31.9328	6.50526	0.353942	11
	X	X	950	11.0915	0.033736	31.2939	8.19763	15.1234	16.5853	34.7741	6.29761	0.25414	21
	X	Y	1000	31.5315	0.0352727	99.661	9.49795	14.4646	6.58521	38.0661	7.1106	0.28091	11
	X	Z	1000	16.9383	0.0372311	50.8699	12.8898	13.7037	11.2266	42.5337	6.51149	0.183659	21
	X	AA	1050	25.4194	0.0384041	78.5109	12.5451	13.2851	8.71266	46.8819	7.58272	0.219065	11
	X	AB	1050	24.617	0.0385701	76.3296	14.2418	13.228	8.3557	51.8181	7.04347	0.192797	21
	X	AC	1100	24.3353	0.0363082	72.4198	11.4352	14.052	12.0432	55.7815	10.0275	0.227101	11
	X	AD	1100	24.0034	0.0341139	73.2118	16.9285	14.9559	9.85037	61.6489	8.09398	0.173888	21
		ID	Temp.	40Ar/39Ar	37Ar/39Ar	36Ar/39Ar	39ArK	K/Ca	40Ar*	39Ar	Age	±1σ	Time
			(°C)			(x 10-3)	(x 10-15 mol)		(%)	(%)	(Ma)	(Ma)	(min)
	X	AE	1100	20.2734	0.0301091	59.3597	30.6433	16.9452	13.4546	72.2699	9.33373	0.106208	61
	X	AF	1100	16.4351	0.0273618	45.1055	35.7778	18.6466	18.8728	84.6705	10.6089	0.0939182	121
	X	AG	1150	12.7237	0.0125293	32.4573	3.07216	40.7209	24.5781	85.7353	10.6941	0.633114	5
	X	AH	1200	9.71861	0.0238778	22.9164	19.7346	21.3673	30.2802	92.5753	10.063	0.115134	5
	X	AI	1250	7.06157	0.0216379	14.166	21.4215	23.5792	40.6731	100	9.81872	0.100039	5
	Integrated age ± 1σ				n=35		288.517	10.3102		K2O=4.61%	8.33599	0.0475172
		ID	Temp.	40Ar/39Ar	37Ar/39Ar	36Ar/39Ar	39ArK	K/Ca	40Ar*	39Ar	Age	±1σ	Time
			(°C)			(x 10-3)	(x 10-15 mol)		(%)	(%)	(Ma)	(Ma)	(min)
	S-971, Feldspar, 11.51 mg, J=0.0018744±0.04%, IC=1.01842±0.00070, NM-291C, Lab#=65788-01
	X	A	400	510.703	0.047904	1678.42	1.03701	10.6506	2.8836	0.161177	49.8443	3.1722	11
	X	B	400	78.0413	0.0224086	252.306	0.740972	22.7682	4.45711	0.276342	11.8947	2.71066	21
	X	C	450	50.4734	-0.0031583	155.902	0.757645	-	8.71077	0.394098	15.0207	2.59425	11
	X	D	450	15.9331	-0.0003922	47.4816	1.67198	-	11.8904	0.653965	6.48509	1.15245	21
	X	E	500	29.0807	0.0095918	84.4045	2.45844	53.1917	14.2106	1.03607	14.1203	0.822956	11
	X	F	500	6.68111	0.0151151	16.6126	3.78064	33.7546	26.4444	1.62367	6.04406	0.507505	21
	X	G	550	14.1397	0.0261453	37.9065	4.97639	19.5142	20.7467	2.39712	10.0315	0.407542	11
	X	H	550	3.80406	0.0444192	7.0652	7.29095	11.4861	45.0859	3.53031	5.86181	0.262687	21
	X	I	600	10.3237	0.0519611	26.8253	9.04018	9.81896	23.1929	4.93538	8.19023	0.228455	11
	X	J	600	3.42211	0.0531005	5.7496	12.1022	9.60827	50.3511	6.81635	5.88753	0.159797	21
	X	K	650	5.03817	0.0421006	10.5702	10.519	12.1187	37.9639	8.45125	6.53961	0.184548	11
	X	L	650	2.81937	0.0170315	3.6241	12.2833	29.9565	61.9467	10.3604	5.96405	0.154142	21
	X	M	700	3.90143	0.0135741	6.9382	9.6452	37.5866	47.3589	11.8595	6.31439	0.199284	11
	X	N	700	2.66489	0.0167167	3.0426	10.0629	30.5206	66.2007	13.4235	6.02318	0.188333	21
	X	O	750	3.70142	0.0146558	6.2269	7.31241	34.8124	50.2027	14.56	6.34956	0.260919	11
	X	P	750	2.7637	0.0150358	3.3401	9.13607	33.9326	64.2181	15.98	6.06011	0.207521	21
	X	Q	800	3.76813	0.0202678	6.5479	7.26877	25.1731	48.5749	17.1097	6.25486	0.263124	11
	X	R	800	2.50753	0.0232425	2.4876	8.29763	21.9513	70.6569	18.3994	6.04777	0.227861	21
	X	S	850	3.73333	0.0226027	6.4733	7.59444	22.5727	48.6904	19.5797	6.21178	0.251219	11
	X	T	850	2.72039	0.0177462	2.9406	9.38446	28.75	68.0085	21.0383	6.31647	0.201493	21
	X	U	900	4.39608	0.0206287	8.3621	9.3007	24.7327	43.7167	22.4839	6.56903	0.208026	11
	X	V	900	3.21091	0.0157807	4.3718	12.1283	32.3309	59.6957	24.3689	6.54695	0.157054	21
	X	W	950	4.42759	0.0158637	8.2411	12.4523	32.1617	44.9186	26.3043	6.79765	0.156661	11
	X	X	950	4.06119	0.013222	6.8696	16.6099	38.5875	49.9334	28.8859	6.9297	0.118105	21
	X	Y	1000	5.61032	0.0175967	11.9476	17.1195	28.9943	36.9984	31.5467	7.09715	0.118884	11
	X	Z	1000	4.87129	0.0169753	9.2829	20.6504	30.0557	43.6153	34.7562	7.26227	0.098162	21
	X	AA	1050	6.2344	0.0178859	13.6777	20.7407	28.5255	35.102	37.9798	7.48275	0.101181	11
	X	AB	1050	5.51249	0.0184051	11.0155	24.0051	27.7208	40.8837	41.7108	7.70418	0.0859618	21
	X	AC	1100	6.40401	0.0232288	13.5348	22.7807	21.9643	37.4905	45.2515	8.20804	0.0939672	11
	X	AD	1100	6.29056	0.0275218	12.7589	27.4915	18.5382	40.0177	49.5244	8.60502	0.0789217	21
		ID	Temp.	40Ar/39Ar	37Ar/39Ar	36Ar/39Ar	39ArK	K/Ca	40Ar*	39Ar	Age	±1σ	Time
			(°C)			(x 10-3)	(x 10-15 mol)		(%)	(%)	(Ma)	(Ma)	(min)
	X	AE	1100	6.01842	0.0236593	11.1036	49.6432	21.5646	45.4352	57.2401	9.34477	0.0465032	61
	X	AF	1150	5.55154	0.0186995	9.2698	8.83035	27.2844	50.6083	58.6126	9.5994	0.220239	5
	X	AG	1200	5.21509	0.0115811	7.864	51.046	44.0549	55.3842	66.5464	9.86683	0.0431737	5
	X	AH	1250	4.93525	0.005155	6.4232	128.294	98.9726	61.4811	86.4864	10.3628	0.0202694	5
	X	AI	1550	5.08346	0.0141733	5.0445	86.9463	35.9975	70.6487	100	12.26	0.0258772	5
	Integrated age ± 1σ				n=35		643.4	29.952		K2O=11.46%	8.83874	0.0191218
	Continued
		ID	Temp.	40Ar/39Ar	37Ar/39Ar	36Ar/39Ar	39ArK	K/Ca	40Ar*	39Ar	Age	±1σ	Time
			(°C)			(x 10-3)	(x 10-15 mol)		(%)	(%)	(Ma)	(Ma)	(min)
	S-193, Feldspar, 12.04 mg, J=0.0018744±0.05%, IC=1.01842±0.00070, NM-291C, Lab#=65790-01
	X	A	450	222.683	0.0696951	729.671	0.491421	7.32051	3.17138	0.4204	24.072	4.4975	21
	X	B	500	201.792	0.0611245	661.052	1.00305	8.34696	3.19559	1.27849	21.9925	2.39693	11
	X	C	500	113.703	0.0991451	372.856	0.863645	5.14603	3.0989	2.01732	12.0497	2.50541	21
	X	D	550	200.08	0.12797	651.228	2.18002	3.9869	3.821	3.88228	26.0459	1.36837	11
	X	E	550	80.1825	0.2399	261.298	1.75112	2.12673	3.71673	5.38032	10.1974	1.2851	21
	X	G	600	197.252	0.147742	655.973	3.18645	3.45334	1.73171	8.10627	11.6833	1.08638	11
	X	H	600	76.6237	0.0768794	252.435	1.73893	6.63642	2.64532	9.59389	6.94102	1.28062	21
	X	I	650	131.006	0.0589375	435.822	1.42675	8.6567	1.69211	10.8144	7.58993	1.67595	11
	X	J	650	76.7041	0.0295597	253.835	1.05446	17.2601	2.20272	11.7165	5.78738	1.97742	21
	X	K	700	211.173	0.0058772	702.117	1.18818	86.8107	1.74742	12.733	12.6169	2.14595	11
	X	L	700	70.2386	0.0418725	230.579	0.858153	12.1847	2.98608	13.4671	7.1815	2.37939	21
	X	M	750	438.783	0.0743825	1463.07	1.08851	6.85919	1.46879	14.3983	21.9809	2.8366	11
	X	N	750	51.99	0.0558857	166.905	0.969431	9.12942	5.12798	15.2276	9.12343	2.07188	21
	X	O	800	285.334	0.0257499	950.66	1.1407	19.8138	1.54516	16.2035	15.0649	2.4469	11
	X	P	800	37.6414	0.0157101	120.593	1.19152	32.4762	5.3102	17.2228	6.84383	1.67701	21
	X	Q	850	124.296	0.0504486	410.585	1.46664	10.1133	2.38485	18.4775	10.1422	1.6529	11
	X	R	850	26.2153	0.05559	81.8989	1.6619	9.17798	7.66931	19.8992	6.88331	1.19583	21
	X	S	900	81.3615	0.034359	267.847	1.86568	14.8492	2.7126	21.4953	7.5562	1.1987	11
	X	T	900	24.8272	0.0488621	77.5802	2.30815	10.4417	7.64519	23.4698	6.49884	0.870135	21
	X	U	950	71.8866	0.0339884	235.048	3.0362	15.0111	3.37251	26.0672	8.2986	0.827865	11
	X	V	950	26.8102	0.0302644	84.2995	3.48078	16.8582	7.06519	29.045	6.48562	0.612936	21
	X	W	1000	58.3312	0.0278068	189.843	5.87558	18.3482	3.81743	34.0714	7.62326	0.475075	11
	X	X	1000	41.3749	0.0242158	133.843	6.17803	21.0691	4.39485	39.3566	6.22713	0.407994	21
	X	Y	1050	50.2155	0.0251304	163.502	9.67104	20.3023	3.77292	47.63	6.48796	0.321622	11
	X	Z	1050	56.5934	0.0270091	185.414	14.3833	18.8901	3.17692	59.9346	6.15763	0.285242	21
	X	AA	1100	52.343	0.03059	169.565	16.8487	16.6788	4.26278	74.3483	7.63858	0.23355	11
	X	AB	1100	83.6333	0.0376714	272.952	17.2465	13.5435	3.55304	89.1023	10.1665	0.301039	21
	X	AC	1100	151.361	0.0722051	494.334	12.7387	7.06604	3.49129	100	18.0421	0.541985	61
	Integrated age ± 1σ				n=28		116.893	11.0292		K2O=1.99%	9.58346	0.134228
	Note: X preceding sample ID denotes analyses excluded from plateau age calculations.

## Sheet: Table DR9
	TABLE DR9. MUSCOVITE Ar/Ar STEP-HEATING DATA
		ID	Temp.	40Ar/39Ar	37Ar/39Ar	36Ar/39Ar	39ArK	K/Ca	40Ar*	39Ar	Age	±1σ	Time
			(°C)			(x 10-3)	(x 10-15 mol)		(%)	(%)	(Ma)	(Ma)	(min)
	S-193, Muscovite, 4.18 mg, J=0.0018655±0.03%, IC=1.01842±0.00070, NM-291D, Lab#=65805-01
		A	550	21.0855	0.0978456	64.2725	2.59091	5.21438	9.92736	1.26516	7.13157	0.769544	31
		B	600	34.2084	0.018166	108.709	1.45549	28.0857	6.07493	1.97589	7.08094	1.37321	31
		C	650	29.8619	0.006096	92.9897	3.54214	83.6949	7.95571	3.70554	8.09234	0.598902	31
		D	700	26.1941	0.0109677	80.2017	6.2926	46.5188	9.49582	6.77827	8.47133	0.365072	31
		E	730	18.3685	-0.0003988	53.8545	7.87709	-	13.3208	10.6247	8.33239	0.275821	31
		F	745	10.8323	0.0036016	28.323	10.4601	141.66	22.676	15.7325	8.36198	0.196884	31
		G	760	7.26397	0.000755	16.2367	13.4407	675.767	33.8693	22.2957	8.37191	0.152359	31
		H	780	5.60354	0.0016397	10.6146	17.3846	311.157	43.939	30.7847	8.37532	0.116908	31
		I	790	5.06992	0.002465	8.8678	13.1784	206.979	48.2275	37.2198	8.31609	0.148529	31
		J	800	4.73016	0.0027393	7.8812	10.5906	186.253	50.6775	42.3913	8.15229	0.181888	31
		K	810	4.91062	-0.0013468	8.6041	8.88344	-	48.129	46.7292	8.03848	0.215523	31
		L	820	4.90899	-0.0013641	8.5649	7.62716	-	48.348	50.4536	8.0723	0.249986	31
		M	830	4.92353	0.0088623	8.5713	6.68981	57.5702	48.4797	53.7203	8.11825	0.285876	31
		N	840	4.9147	7.5e-05	8.7392	6.05256	6802.72	47.3603	56.6758	7.91695	0.313654	31
		O	850	4.98289	0.0045335	9.0659	5.45154	112.541	46.149	59.3378	7.82192	0.348147	31
		P	870	4.90238	-0.0062652	8.3977	6.14627	-	49.2782	62.3391	8.21616	0.309242	31
		Q	890	4.82635	0.0038538	8.3225	6.83363	132.39	48.9582	65.676	8.03643	0.279212	31
		R	910	4.63716	0.0055551	7.7203	7.75119	91.8443	50.7182	69.461	7.99848	0.24563	31
		S	940	4.5207	0.0047052	7.3007	9.4659	108.434	52.1942	74.0833	8.02407	0.203466	31
		T	970	4.73097	-0.0025186	7.9943	8.81047	-	49.9704	78.3855	8.04014	0.217477	31
		U	1000	4.59536	0.0029437	7.4275	11.1388	173.321	52.1527	83.8246	8.15007	0.171647	31
		V	1030	3.92492	0.0017453	5.0218	16.4908	292.33	62.1104	91.8772	8.28707	0.117426	31
		W	1080	3.68007	0.0046064	4.0746	16.6345	110.76	67.2142	100	8.40708	0.115775	31
	Integrated age ± 1σ				n=23		204.789	137.701		K2O=10.09%	8.07202	0.0457493
	Plateau ± 1σ			steps A-W	n=23	MSWD=0.74	204.789	409.0 ±1391.1		100	8.24148	0.041659
	Continued
		ID	Temp.	40Ar/39Ar	37Ar/39Ar	36Ar/39Ar	39ArK	K/Ca	40Ar*	39Ar	Age	±1σ	Time
			(°C)			(x 10-3)	(x 10-15 mol)		(%)	(%)	(Ma)	(Ma)	(min)
	S-1278, Muscovite, 5.9 mg, J=0.0018661±0.03%, IC=1.01842±0.00070, NM-291D, Lab#=65807-01
	X	A	550	19.8886	0.107567	56.9623	4.82894	4.74315	15.3743	1.63316	10.4114	0.436573	31
	X	B	600	7.17088	0.117328	11.8384	4.97525	4.34853	51.2899	3.31581	12.5062	0.382507	31
	X	C	650	7.10679	0.0131536	8.9003	7.98729	38.7882	62.9621	6.01713	15.2026	0.241165	31
	X	D	700	9.2824	0.01258	11.5493	9.52093	40.5568	63.2098	9.23714	19.9148	0.20583	31
	X	E	730	11.7752	0.0007984	15.0942	8.30295	639.033	62.0938	12.0452	24.7887	0.239181	31
	X	F	745	14.4739	0.0034909	20.1882	6.89934	146.153	58.7609	14.3786	28.8066	0.290515	31
	X	G	760	14.3559	-0.0009401	17.6222	7.26189	-	63.7036	16.8346	30.9566	0.277029	31
	X	H	780	14.1607	0.005672	15.345	11.0415	89.9513	67.9621	20.5689	32.5626	0.185864	31
	X	I	790	14.6713	0.0084986	15.1939	7.6764	60.0339	69.3838	23.165	34.4256	0.259931	31
	X	J	800	12.7563	0.0007576	9.645	12.1381	673.448	77.6424	27.2702	33.5003	0.165177	31
	X	K	810	12.6655	-1.48e-05	8.9645	13.6482	-	79.0703	31.886	33.8698	0.1458	31
	X	L	820	12.2059	0.0070805	8.0149	11.5836	72.0576	80.5871	35.8036	33.2716	0.171574	31
	X	M	830	11.8615	0.0003315	7.6086	10.4107	1539.08	81.031	39.3246	32.5168	0.189263	31
	X	N	840	11.5599	-0.0018716	7.2098	9.64553	-	81.5545	42.5867	31.8994	0.203695	31
	X	O	850	11.3802	0.0083418	7.0727	9.76607	61.1623	81.6266	45.8896	31.4352	0.201674	31
	X	P	870	11.0733	0.0040102	6.3166	11.3172	127.227	83.133	49.7171	31.1536	0.174318	31
	X	Q	890	10.9088	0.0002168	5.8662	14.0068	2353.34	84.0967	54.4543	31.0471	0.141131	31
	X	R	910	98.1526	0.0191339	236.653	0.195145	26.6649	28.7486	54.5203	93.9288	11.998	31
	X	S	940	10.8859	0.0015335	3.8745	25.77	332.706	89.4751	63.2358	32.9462	0.0775131	31
	X	T	970	11.4502	0.0020965	4.0823	33.7194	243.36	89.4581	74.6398	34.6329	0.0607457	31
	X	U	1000	11.9199	0.0006635	3.6331	35.604	768.959	90.9872	86.6812	36.6507	0.0576211	31
	X	V	1030	12.2187	0.0020349	2.6746	30.5699	250.727	93.5285	97.02	38.5987	0.0666452	31
	X	W	1080	13.1148	0.0100245	4.8788	8.81133	50.8957	89.0063	100	39.4197	0.224972	31
	Integrated age ± 1σ				n=23		295.68	76.4128		K2O=10.32%	31.8066	0.0331916
	Continued
		ID	Temp.	40Ar/39Ar	37Ar/39Ar	36Ar/39Ar	39ArK	K/Ca	40Ar*	39Ar	Age	±1σ	Time
			(°C)			(x 10-3)	(x 10-15 mol)		(%)	(%)	(Ma)	(Ma)	(min)
	S-971, Muscovite, 4.27 mg, J=0.0018691±0.03%, I.C.*=1.01842±0.00070, NM-291D, Lab#=65809-01
	X	A	550	40.545	0.0935669	121.724	1.85743	5.45283	11.2853	0.813648	15.586	1.10922	31
	X	B	600	11.8581	0.0987362	23.93	1.62557	5.16734	40.3918	1.52573	16.3035	1.1688	31
	X	C	650	10.5713	0.0179241	18.4965	3.25961	28.4647	48.2678	2.9536	17.3608	0.591532	31
	X	D	700	12.2222	0.0182805	23.0495	5.23384	27.9097	44.2447	5.24629	18.3959	0.377358	31
	X	E	730	15.3897	0.0064629	31.2193	5.7195	78.9435	40.0243	7.75172	20.9422	0.350473	31
	X	F	745	14.3708	0.0009103	26.3811	6.36526	560.479	45.7213	10.54	22.3297	0.320231	31
	X	G	760	13.6635	0.0047258	22.2452	8.73587	107.961	51.8623	14.3668	24.0701	0.233137	31
	X	H	780	12.1124	-0.0002932	15.2604	13.8057	†N.D.	62.7427	20.4144	25.7997	0.148605	31
	X	I	790	10.9903	-0.0013315	10.7236	14.1618	†N.D.	71.1431	26.618	26.5364	0.14287	31
	X	J	800	10.0352	-0.0008302	7.8145	12.9205	†N.D.	76.9681	32.2778	26.2147	0.152539	31
	X	K	810	9.86067	0.0004027	7.5232	11.8637	1266.96	77.4354	37.4747	25.9168	0.166959	31
	X	L	820	9.60341	0.002884	6.8495	10.3463	176.908	78.9074	42.0069	25.7213	0.187962	31
	X	M	830	9.52246	0.0041995	6.9859	8.99089	121.492	78.3045	45.9454	25.3122	0.215119	31
	X	N	840	9.62185	-0.0028762	7.5173	7.69268	†N.D.	76.8903	49.3151	25.116	0.251016	31
	X	O	850	9.58854	0.0030418	7.8838	6.77877	167.731	75.6837	52.2846	24.6395	0.284747	31
	X	P	870	9.46361	-0.0033242	7.7891	7.6746	†N.D.	75.6526	55.6464	24.3103	0.252724	31
	X	Q	890	9.46807	-0.0019739	8.5208	7.92331	†N.D.	73.3795	59.1173	23.5956	0.24442	31
	X	R	910	9.26324	0.0026467	8.3161	8.69905	192.77	73.4488	62.9279	23.1096	0.222997	31
	X	S	940	9.05263	0.0009867	7.9629	11.9314	517.081	73.983	68.1544	22.7501	0.164081	31
	X	T	970	9.16161	0.000282	7.2937	15.2392	1809.23	76.4524	74.83	23.786	0.129454	31
	X	U	1000	9.37399	0.0032994	6.6992	18.0861	154.635	78.8645	82.7526	25.0969	0.109267	31
	X	V	1030	9.37448	0.0011187	4.5392	23.5076	456.069	85.679	93.0501	27.2508	0.0845186	31
	X	W	1080	9.56394	0.0028314	3.7615	15.8654	180.195	88.3694	100	28.664	0.123141	31
	Integrated age ± 1σ				n=23		228.284	157.706		K2O=10.99%	24.4822	0.0413939
	Note: X preceding sample ID denotes analyses excluded from plateau age calculations.
	*I.C. = detector intercalibration = (40Ar/36Ar) measured divided by 295.5
	†N.D. = No dectable 37Ar above blank value.
